# Supplementary material
Source: publisher site journal article supplement (https://www.dovepress.com/article/252033)

Supplementary Figure 1 Global health status as estimated by patients and physicians according to treating physicians (pulmonologists vs GPs)

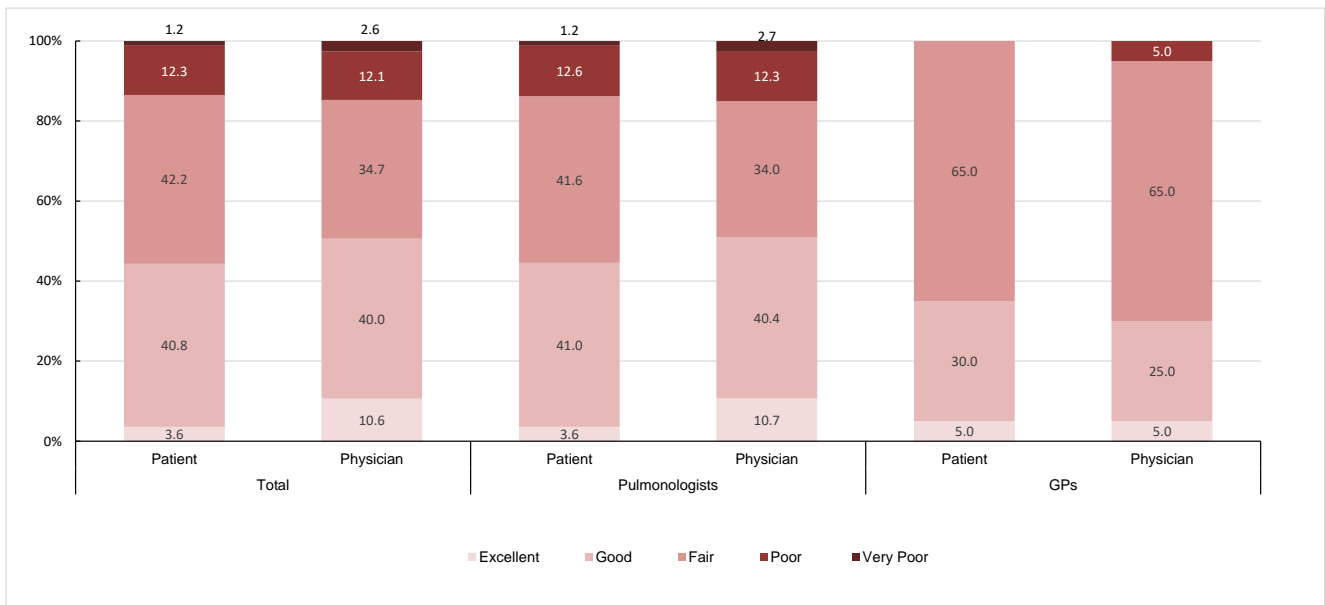

Supplement: Supplementary file 1 [file get_supplementary_file.php]
